# Supplementary material
Source: Springer Nature journal article supplement (https://www.springermedizin.de/resource/supplementary/12960_2009_171_MOESM1_ESM.pdf/9570564)
Supplement: MOESM1 [file 9570564]

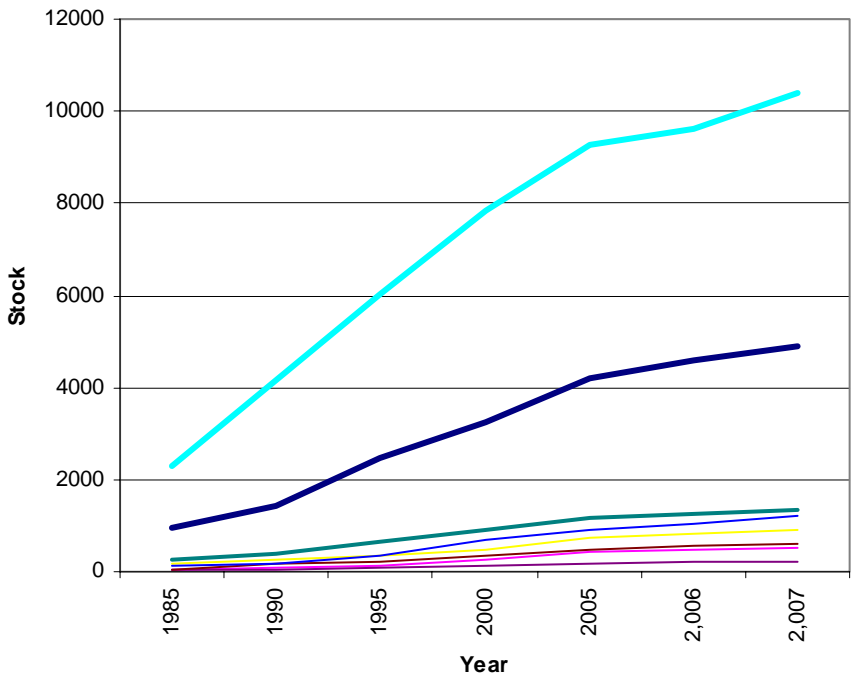

Physicians

Dentists

Pharmacists

Nurses

Physiotherapists

Radiographers

Lab. Technicians

Asst. Pharma.
